# Supplementary material for: Bi-doped graphitic carbon nitride nanotubes boost the photocatalytic degradation of Rhodamine B
Source: Royal Society of Chemistry journal article supplement (doi:10.1039/d1nj05569k), 2021-12-29
Supplement: d1nj05569k1.pdf [file d1nj05569k1.pdf]

## Support information

### **Bi-doped Graphitic Carbon Nitride Nanotubes Boosts the Degradation Photocatalysis of Rhodamine B**

Qingqing Gao<sup>a,b,#</sup>, Qian Lei<sup>a,#</sup>, Ruoyan Miao<sup>a</sup>, Manyi Gao<sup>a,b</sup>, Hu Liu<sup>a\*</sup>, Qin Yang<sup>a</sup>, Yequn Liu<sup>c</sup>, Fang Song<sup>d</sup>, Yongsheng Yu<sup>b\*</sup>, Weiwei Yang<sup>b\*</sup>

<sup>a</sup>School of Chemistry and Chemical Engineering, Xi'an University of Architecture and Technology, Xi'an 710055, China.

<sup>b</sup>MIIT Key Laboratory of Critical Materials Technology for New Energy Conversion and Storage, School of Chemistry and Chemical Engineering, Harbin Institute of Technology, Harbin, Heilongjiang 150001, China.

<sup>c</sup>Institutional Center for Shared Technologies and Facilities of Institute of Coal Chemistry, CAS, State Key Laboratory of Coal Conversion, Taiyuan 030001, China.

<sup>d</sup>Instrumental Analysis Center, Xi'an University of Architecture and Technology, Xi'an 710055, China.

\*To whom correspondence should be addressed. Email: liuhu@xauat.edu.cn, yangww@hit.edu.cn and ysyu@hit.edu.cn

#These authors contributed equally.

## **Electrochemical measurements**

The electrochemical characteristics and electrochemical impedance spectroscopy (EIS) were measured on an electrochemical workstation (CHI660E, China) with a three-electrode system to describe the carrier transfer process of the samples during the reaction. The sample was prepared as a working electrode while an Ag/AgCl electrode and a Pt slice worked as a reference electrode and a counter electrode, respectively. All the electrochemical testing was conducted in 0.2 M Na<sub>2</sub>SO<sub>4</sub> solution.

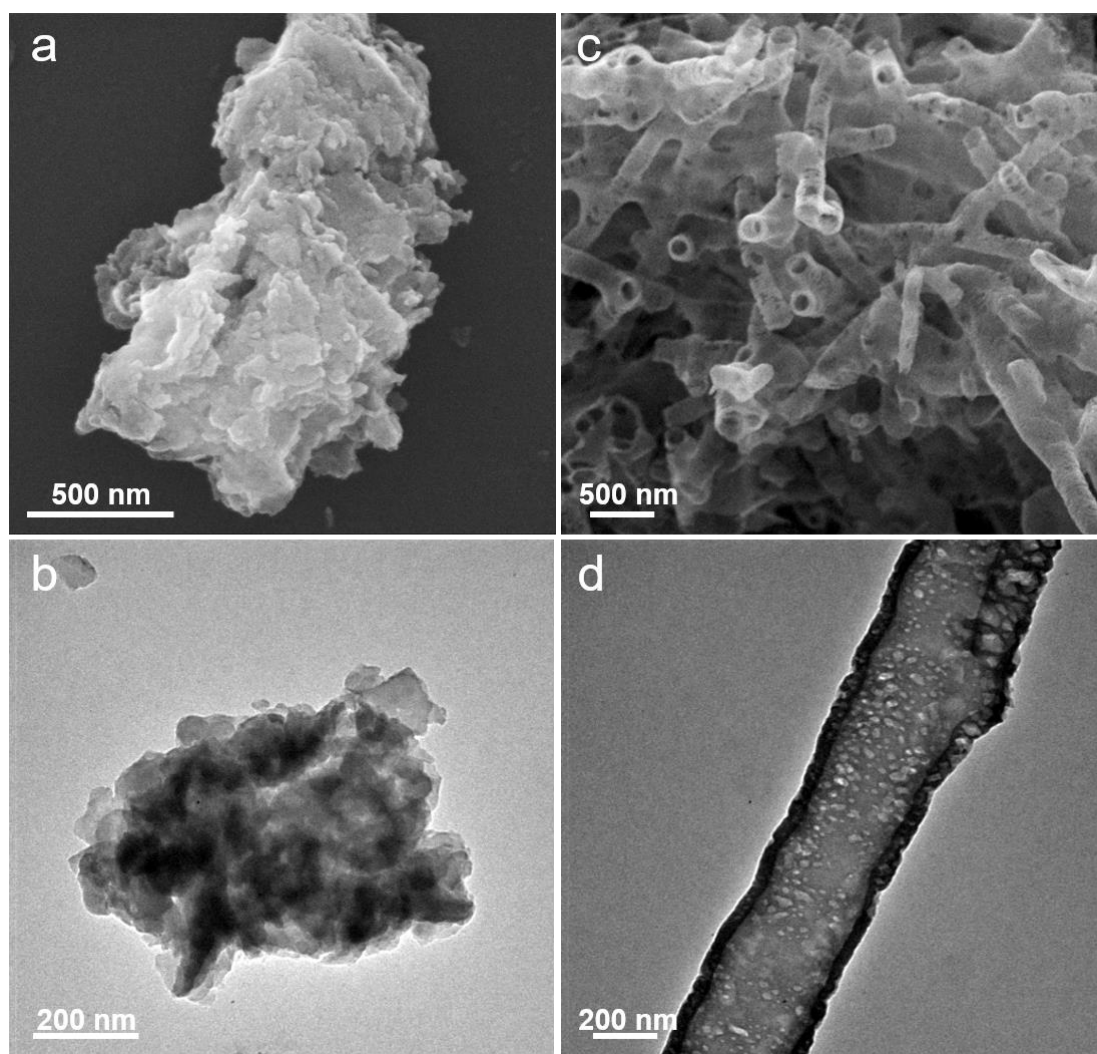

**Fig. S1.** SEM images of (a) PCN, (c) PCN-1; TEM images of (b) PCN, (d) PCN-1.

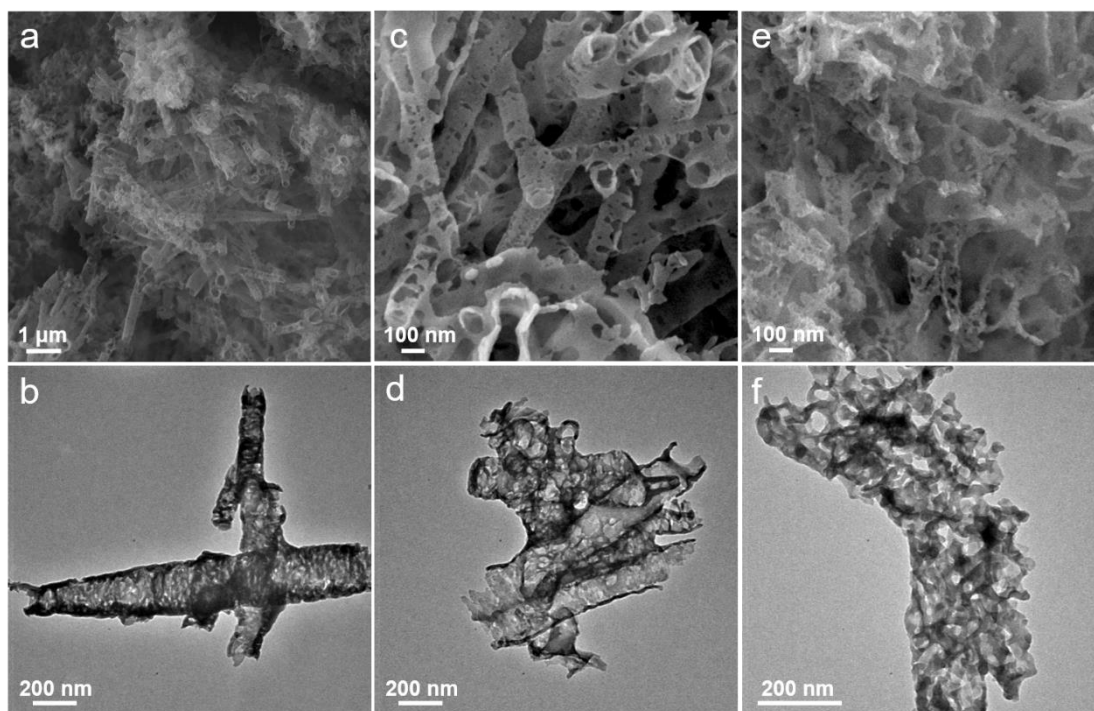

**Fig. S2.** SEM images of (a) 0.05BCN, (c) 0.2BCN, (e) 0.4BCN; TEM images of (b) 0.05BCN, (d) 0.2BCN, (f) 0.4BCN.

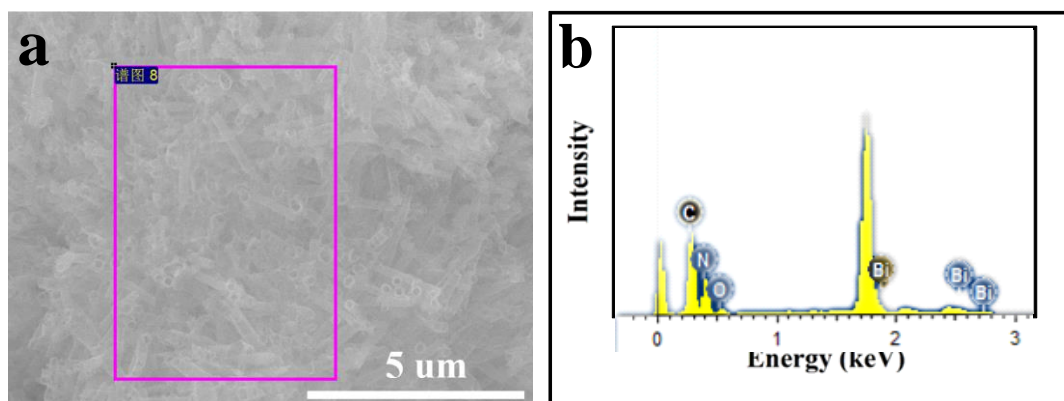

**Fig. S3.** SEM-EDS of the 0.1BCN

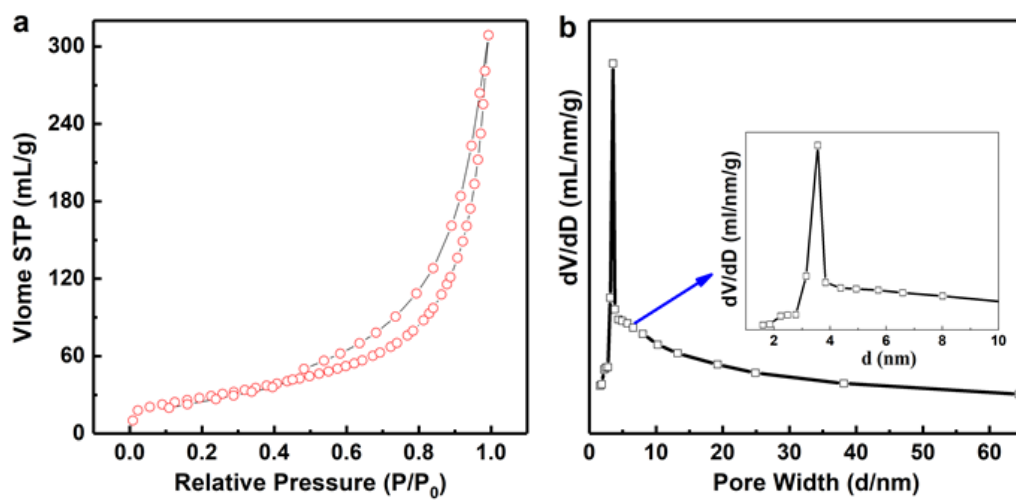

**Figure S4.** a) N<sub>2</sub> adsorption-desorption isotherm and b) pore-size distribution curves of 0.1BCN.

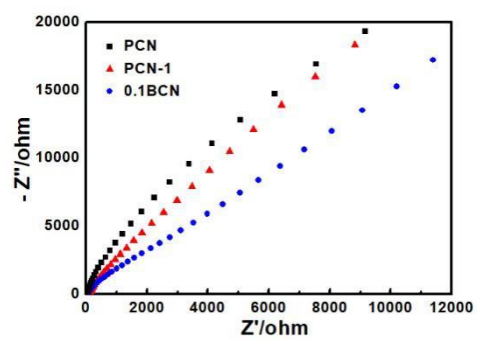

**Fig. S5.** The EIS plots of PCN, PCN-1 and 0.1BCN.

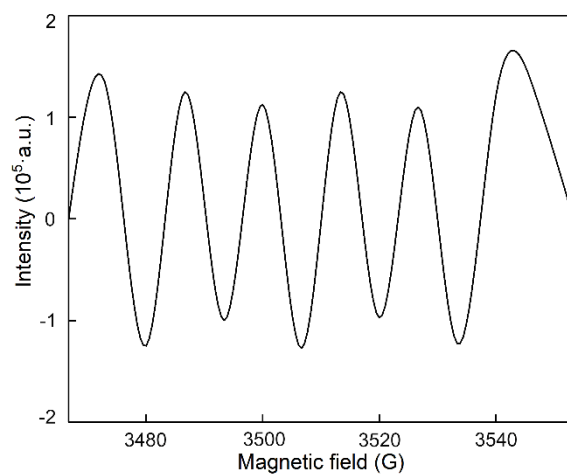

**Figure S6.** ESR signals of DMPO- $\cdot$ OH adducts in 0.1BCN dispersion of water under 120 s illumination.

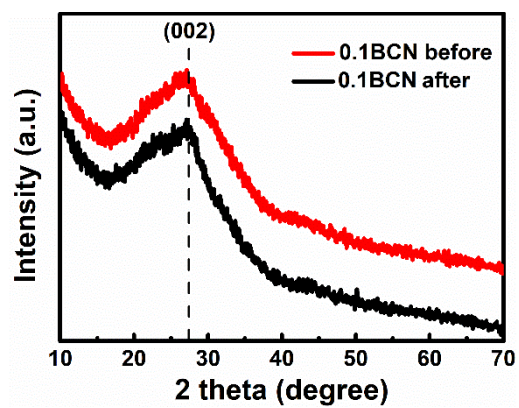

**Fig. S7.** XRD of 0.1BCN before and after use for four times

**Table S1** mass percentage of Bi in PCN-1 and xBCN samples

| Sample  | PCN-1 | 0.05BCN | 0.1BCN | 0.2BCN | 0.4BCN |
|---------|-------|---------|--------|--------|--------|
| Bi(wt%) | 0     | 5.04    | 6.48   | 13.35  | 25.49  |

**Table S2** contents of C and N in PCN-1 and 0.1BCN samples

| Sample | N(wt%) | C(wt%) | C/N (in mol) |
|--------|--------|--------|--------------|
| PCN-1  | 56.925 | 32.765 | 0.67         |
| 0.1BCN | 51.81  | 29.81  | 0.62         |
